# Supplementary material for: cAMP−EPAC−PKCε−RIM1α signaling regulates presynaptic long-term potentiation and motor learning
Source: eLife journal article supplement (doi:10.7554/elife.80875), 2023-04-26

**F**

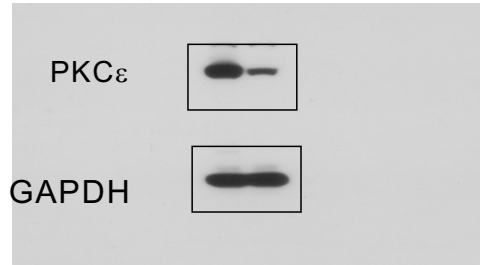

**E**

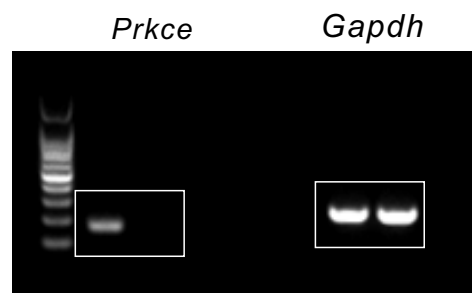

**J**

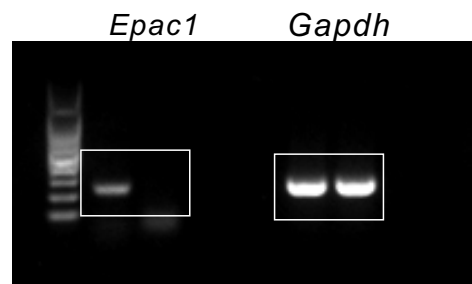

**L**

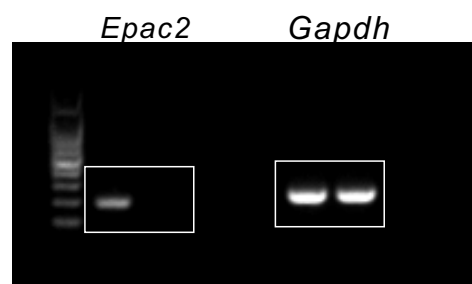

Supplement: supp [file elife-80875-supp-v1.zip]
